# Supplementary material
Source: PubMed Central journal article supplement (PMC2515207)
Supplement: embor200896-s1.pdf [file embor200896-s1.pdf]

## Supplementary Figure 1 Kaseda et al.

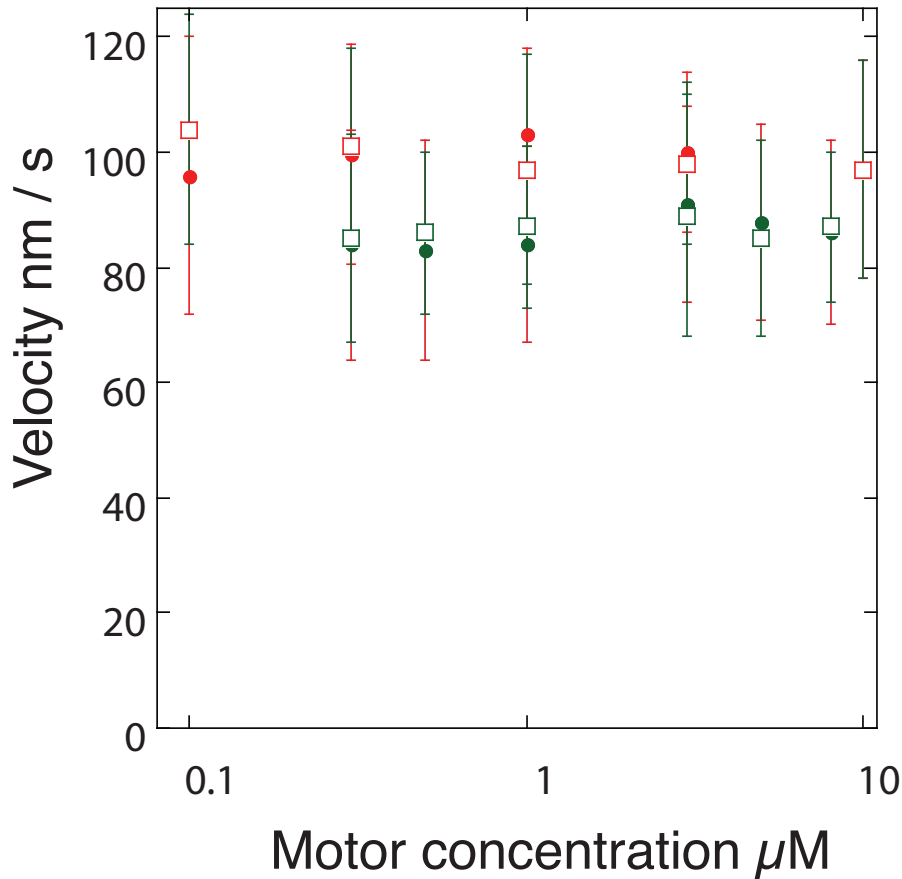

Kaseda et al | Single headed mode of kinesin-5

**Supplementary Fig 1** | Microtubule gliding speeds for double-headed (red) and singleheaded (green) Eg5 at different surface densities. Circles: Eg5 motors at a given concentration were introduced into a chamber. Squares: Tail-his construct, as a histidinetagged protein, was used as a diluent for the active motor, in order to vary the motor density on the surface against a background of full labeling of the surface with his-tagged protein. Total motor domain concentrations were 10 μM for double headed Eg5 (red) and 8 μM for single-headed Eg5 (green). Movement was smooth for the entire range that is plotted. At very low motor concentrations (not shown), movement became sporadic.

## Supplementary Figure 2 Kaseda et al.

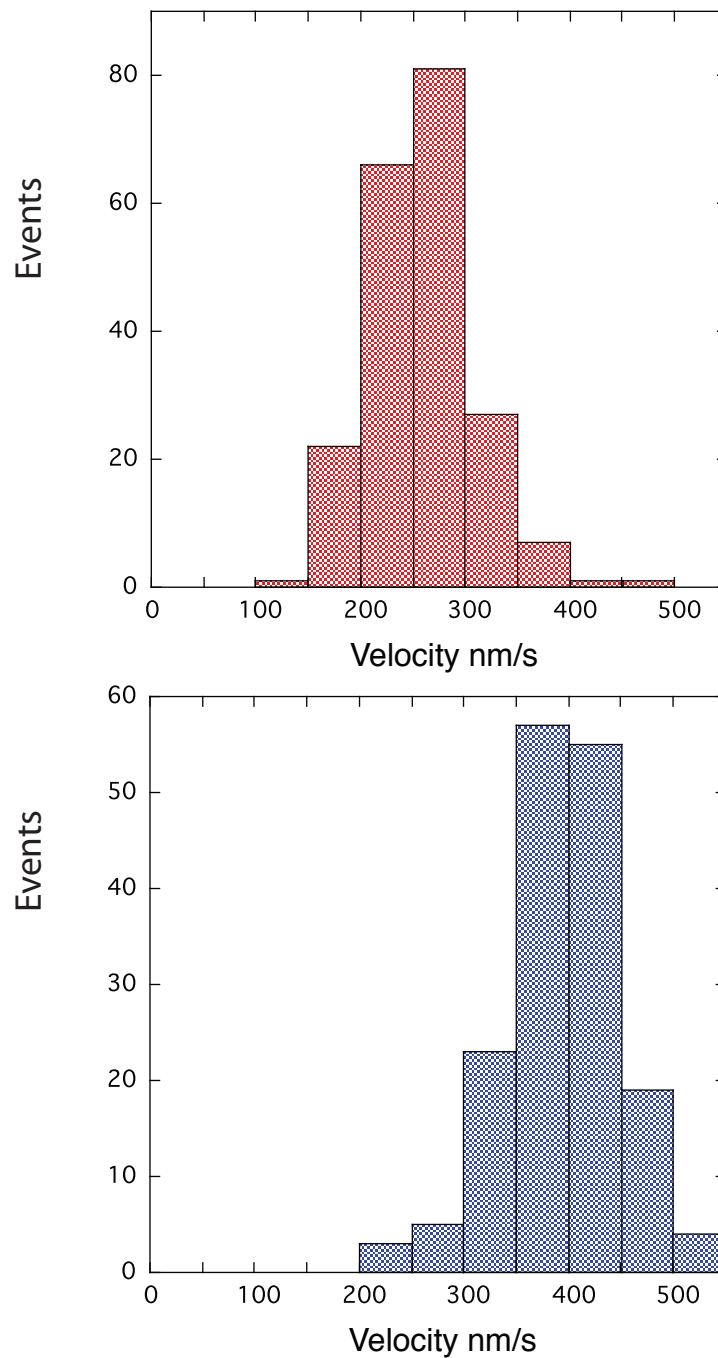

Kaseda et al | Single headed mode of kinesin-5

**Supplementary Fig 2** | Microtubule gliding driven by mixtures of kinesin-1 homodimer and kinesin-1/Eg5 heterodimer. The mixture moves MTs at  $259 \pm 50$  nm/s and  $392 \pm 55$  nm/s in the absence (top) and in the presence (bottom) of 1 mM monastrol, respectively.
